# Supplementary material
Source: Springer Nature journal article supplement (https://www.springermedizin.de/resource/supplementary/13054_2006_4456_MOESM2_ESM.pdf/9722992)

# Contact Pressure (cmH<sub>2</sub>O)

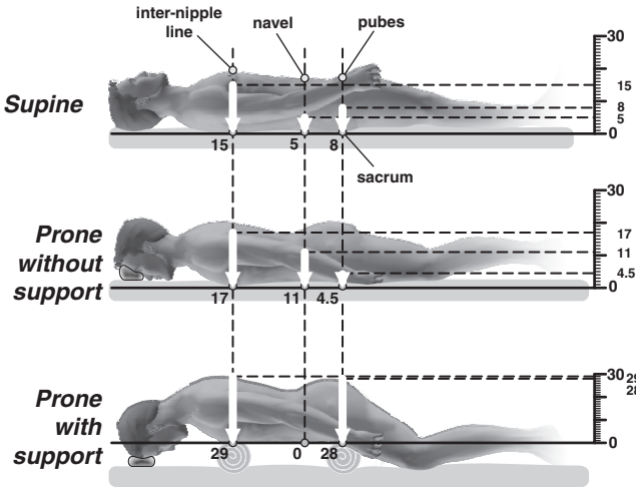

Supplement: MOESM2 [file 9722992]
